# Supplementary material for: Resource allocation accounts for the large variability of rate-yield phenotypes across bacterial strains
Source: eLife. 2023 May 31;12:e79815. doi: 10.7554/eLife.79815 (PMC10270689; doi:10.7554/eLife.79815)
Supplement: Supplementary file 1. [file elife-79815-supp1.xlsx]

## Sheet: Description
Supplementary file S1 : Reported rate-yield pairs for different E. coli strains grown on glucose minimal medium, in batch and continous cultures

## Sheet: Batch
Growth rate (1/h)	Yield	Biomass Yield (gDW/g_glc)	Glucose uptake rate	Acetate secretion rate	Rate unit	Normalized acetate overflow rate	Strain	Reference	PMID
0.6	0.492	0.41	8.16	4.95	mmol/gDW /h	0.202206	BW25113 – WT	Haverkorn van Rijsewijk et al. (2011)	21451587
0.54	0.444	0.37	8.11	3.92		0.161118	BW25113 – mutant
0.55	0.48	0.4	7.74	4.76		0.204996	BW25113 – mutant
0.56	0.516	0.43	7.3	3.19		0.145662	BW25113 – mutant
0.56	0.504	0.42	7.36	4.39		0.198822	BW25113 – mutant
0.46	0.456	0.38	6.87	4.64		0.225133	BW25113 – mutant
0.53	0.492	0.41	7.28	4.72		0.216117	BW25113 – mutant
0.52	0.492	0.41	7.15	4.89		0.227972	BW25113 – mutant
0.53	0.504	0.42	7.12	3.69		0.172753	BW25113 – mutant
0.51	0.492	0.41	6.9	5.04		0.243478	BW25113 – mutant
0.54	0.468	0.39	7.86	5.96		0.252757	BW25113 – mutant
0.54	0.456	0.38	8.06	5.12		0.211745	BW25113 – mutant
0.54	0.492	0.41	7.37	4.33		0.195839	BW25113 – mutant
0.46	0.492	0.41	6.33	4.03		0.212217	BW25113 – mutant
0.32	0.408	0.34	5.27	2.61		0.165085	BW25113 – mutant
0.55	0.492	0.41	7.48	5.31		0.236631	BW25113 – mutant
0.55	0.504	0.42	7.13	4.25		0.198691	BW25113 – mutant
0.47	0.408	0.34	6.68	4.73		0.236028	BW25113 – mutant
0.55	0.54	0.45	6.9	3.55		0.171498	BW25113 – mutant
0.57	0.504	0.42	7.49	5.19		0.230975	BW25113 – mutant
0.59	0.432	0.36	9.13	4.72		0.172326	BW25113 – mutant
0.54	0.492	0.41	7.44	4.65		0.208333	BW25113 – mutant
0.58	0.468	0.39	8.2	4.08		0.165854	BW25113 – mutant
0.66	0.504	0.42	8.8	4.01		0.151894	BW25113 – mutant
0.52	0.504	0.42	7.11	4.07		0.190811	BW25113 – mutant
0.51	0.492	0.41	7.05	4.55		0.21513	BW25113 – mutant
0.55	0.504	0.42	7.31	4.29		0.195622	BW25113 – mutant
0.55	0.504	0.42	7.21	4.25		0.196486	BW25113 – mutant
0.47	0.456	0.38	6.51	4.96		0.253968	BW25113 – mutant
0.56	0.408	0.34	8.95	4.91		0.182868	BW25113 – mutant
0.54	0.48	0.4	7.77	4.4		0.18876	BW25113 – mutant
0.54	0.456	0.38	7.99	4.56		0.190238	BW25113 – mutant
0.52	0.516	0.43	6.84	4.44		0.216374	BW25113 – mutant
0.54	0.432	0.36	8.26	4.52		0.182405	BW25113 – mutant
0.4	0.552	0.46	4.76	4		0.280112	BW25113 – mutant
0.49	0.396	0.33	8.13	4.51		0.184912	BW25113 – mutant
0.44	0.576	0.48	5.11	3.7		0.241357	BW25113 – mutant
0.5	0.42	0.35	8.14	4.08		0.167076	BW25113 – mutant
0.55	0.528	0.44	7.03	4.5		0.213371	BW25113 – mutant
0.44	0.468	0.39	6.45	3.64		0.188114	BW25113 – mutant
0.55	0.48	0.4	7.66	2.89		0.125762	BW25113 – mutant
0.55	0.588	0.49	6.39	3.8		0.198226	BW25113 – mutant
0.57	0.456	0.38	8.32	4.64		0.185897	BW25113 – mutant
0.49	0.456	0.38	7.24	4.12		0.189687	BW25113 – mutant
0.45	0.54	0.45	5.52	4.34		0.262077	BW25113 – mutant
0.56	0.492	0.41	7.72	4.09		0.176598	BW25113 – mutant
0.55	0.456	0.38	8.1	4.29		0.176543	BW25113 – mutant
0.53	0.528	0.44	6.71	4.12		0.20467	BW25113 – mutant
0.56	0.444	0.37	8.3	3.62		0.145382	BW25113 – mutant
0.55	0.504	0.42	7.23	4.71		0.217151	BW25113 – mutant
0.55	0.528	0.44	6.98	5.24		0.250239	BW25113 – mutant
0.54	0.456	0.38	7.81	4.42		0.188647	BW25113 – mutant
0.5	0.456	0.38	7.41	3.45		0.155196	BW25113 – mutant
0.57	0.492	0.41	7.75	4.01		0.172473	BW25113 – mutant
0.49	0.444	0.37	7.42	4.4		0.197664	BW25113 – mutant
0.55	0.456	0.38	8.09	3.69		0.15204	BW25113 – mutant
0.53	0.468	0.39	7.54	5.62		0.248453	BW25113 – mutant
0.52	0.432	0.36	7.93	3.86		0.162253	BW25113 – mutant
0.5	0.492	0.41	7.03	5.09		0.241347	BW25113 – mutant
0.5	0.54	0.45	6.38	4.06		0.212121	BW25113 – mutant
0.52	0.456	0.38	7.65	4.2		0.183007	BW25113 – mutant
0.51	0.48	0.4	7.31	4.23		0.192886	BW25113 – mutant
0.54	0.468	0.39	7.73	4.51		0.19448	BW25113 – mutant
0.55	0.468	0.39	7.95	5.9		0.247379	BW25113 – mutant
0.59	0.444	0.37	8.85	5.22		0.19661	BW25113 – mutant
0.51	0.504	0.42	6.88	3.8		0.184109	BW25113 – mutant
0.53	0.528	0.44	6.64	4.45		0.223394	BW25113 – mutant
0.5	0.408	0.34	8.1	4.42		0.181893	BW25113 – mutant
0.53	0.504	0.42	7.21	4.82		0.222839	BW25113 – mutant
0.52	0.516	0.43	6.84	4.32		0.210526	BW25113 – mutant
0.54	0.492	0.41	7.42	4.73		0.212489	BW25113 – mutant
0.5	0.432	0.36	7.69	5.16		0.223667	BW25113 – mutant
0.55	0.492	0.41	7.5	4.9		0.217778	BW25113 – mutant
0.55	0.444	0.37	8.26	4.78		0.192897	BW25113 – mutant
0.58	0.504	0.42	7.74	4.38		0.18863	BW25113 – mutant
0.56	0.54	0.45	7.02	4.18		0.198481	BW25113 – mutant
0.48	0.492	0.41	6.73	4		0.198118	BW25113 – mutant
0.51	0.492	0.41	7	4.94		0.235238	BW25113 – mutant
0.52	0.492	0.41	6.84	4.85		0.236355	BW25113 – mutant
0.53	0.444	0.37	7.96	5.64		0.236181	BW25113 – mutant
0.51	0.504	0.42	6.95	4.85		0.232614	BW25113 – mutant
0.55	0.528	0.44	6.93	3.77		0.181337	BW25113 – mutant
0.54	0.468	0.39	7.68	5.13		0.222656	BW25113 – mutant
0.51	0.492	0.41	7.1	4.63		0.217371	BW25113 – mutant
0.5	0.384	0.32	8.78	4.75		0.180334	BW25113 – mutant
0.54	0.492	0.41	7.43	5.04		0.22611	BW25113 – mutant
0.51	0.528	0.44	6.61	4.61		0.232476	BW25113 – mutant
0.35	0.468	0.39	4.12	2.36		0.190939	BW25113 – mutant
0.56	0.516	0.43	7.55	4.18		0.184547	BW25113 – mutant
0.52	0.456	0.38	7.6	4.44		0.194737	BW25113 – mutant
0.53	0.564	0.47	6.29	5.31		0.281399	BW25113 – mutant
0.54	0.588	0.49	6.22	4.51		0.241693	BW25113 – mutant
0.32	0.528	0.44	4.01	1.51		0.12552	BW25113 – mutant
0.44	0.468	0.39	6.35	4.62		0.24252	BW25113 – mutant
0.53	0.348	0.29	8.8	7.94		0.300758	BW25113 – mutant
0.81	0.546073	0.455061	4.94	0.7		0.0472335	NCM3722	Cheng et al. (2019)	31158228
0.88	0.52522	0.437683	5.58	1.88	mM/OD600/h	0.112306	NCM3722
0.97	0.598234	0.498528	5.4	2.52		0.155556	NCM3722 WT
0.94	0.629889	0.524908	4.97	2.37		0.158954	NCM3722
0.91	0.553036	0.460864	5.48	2.38		0.144769	NCM3722
0.88	0.573528	0.47794	5.11	1.94		0.126549	NCM3722
0.87	0.562607	0.468839	5.15	1.5		0.0970874	NCM3722
0.81	0.575182	0.479318	4.69	1.16		0.0824449	NCM3722
0.75	0.579531	0.482943	4.31	0		0	NCM3722
0.71	0.606299	0.505249	3.9	0		0	NCM3722
0.68	0.574785	0.478988	3.94	0		0	NCM3722
0.58	0.594343	0.495286	3.25	0		0	NCM3722
0.78	0.582442	0.485368	4.46	0.03		0.00224215	NCM3722
0.74	0.585386	0.487822	4.21	0		0	NCM3722
0.833473	0.569255		9.9196	3.35	mmol/gDW /h	0.112572	C	Monk et al. (2016)	27667363
0.773222	0.539584		9.70854	3.12		0.107122	DH5a
0.728033	0.515521		9.56784	3.49		0.121588	MG1655
0.617573	0.629348		6.64824	2.95		0.147909	W3110
0.76318	0.644698		8.0201	0.27		0.0112218	BL21
0.969038	0.657183		9.98995	0.1		0.00333669	W
0.969038	0.527232		12.4523	0.53		0.0141875	Crooks
0.89	0.47967					NaN	CP14	Andersen and von Meyenburg (1980)	6998942
0.57	0.459732		8.4	2.604	mmol/gDW /h	0.103333	MG1655	Morin et al. (2016)	26833659
0.31	0.49		5.3	0.106		0.00666667	MG1655 - mutant
0.74	0.552	0.46	8.87	4.42	mmol/gDW /h	0.166103	BW25113 -WT	Castano-Cerezo et al. (2014)	25518064
0.68	0.432	0.36	10.51	5.98		0.189661	BW25113 - mutant
0.7	0.564	0.47	8.2	3.97		0.161382	BW25113 - mutant
0.65	0.528	0.44	8.21	6.07		0.246447	BW25113 - mutant
0.67	0.54	0.45	8.36	4.49		0.179027
0.49	0.432	0.36	NaN			NaN	MG1655	Trinh et al. (2006)	16997589
0.37	0.54	0.45				NaN	MG1655 -mutant
0.556231	0.539818	0.449848	NaN			NaN	K-12 MG1655	Baumler et al. (2011)	22044664
0.534954	0.386626	0.322188				NaN	K-12 W3110
0.796353	0.561702	0.468085				NaN	EDL933 *
0.799392	0.477812	0.398176				NaN	RIMD/Sakai *
0.756839	0.616413	0.513678				NaN	CFT073*
0.547112	0.415805	0.346505				NaN	UTI89 *
0.69	0.544208		8.59	3.91	mmol/gDW /h	0.151727	WT MG1655	Monk et al (2017)	29020004
0.94	0.602507		10.57	NaN	mo/kg DW /h		ML308	Holms (1996)	8988566
0.72	0.57		7.24	NaN	mmol/gDW /h		VC	Novak Microb Cell Fact (2018)	29986728
0.68	0.44		6.9	NaN			ACS_L641P
0.775093	0.6	0.5					MG1655	Steinsiek and Bettenbrock (2012)	22923596
0.82342	0.6	0.5					MG1655 - mutant
0.765799	0.6	0.5					MG1655 - mutant
0.801115	0.6	0.5					MG1655 - mutant
0.784387	0.6	0.5					MG1655 - mutant
0.784387	0.6	0.5					MG1655 - mutant
0.204461	0.6	0.5					MG1655 - mutant
0.184015	0.6	0.5					MG1655 - mutant
0.174721	0.6	0.5					MG1655 - mutant
0.247212	0.6	0.5					MG1655 - mutant
0.66555	0.50496	0.4208	8.78683	3.44651	mmol/gDW /h	0.130745	BL21	Long et al. (2017)	28951266
0.632575	0.497399	0.414499	8.47845	6.05062		0.237882	BW25113
0.676733	0.533006	0.444171	8.46437	5.56578		0.219185	MG1655 WT
0.8858	0.510181	0.42515	11.575	7.84205		0.225833	MG1655 ALE-1
0.869233	0.536891	0.447409	10.7934	6.89128		0.212824	MG1655 ALE-2
0.890833	0.496317	0.413597	11.9659	8.71383		0.24274	MG1655 ALE-3
0.818967	0.530562	0.442135	10.2906	6.83565		0.221422	MG1655 ALE-4
0.934367	0.526853	0.439044	11.8232	8.03853		0.226631	MG1655 ALE-5
0.936067	0.500875	0.417396	12.4591	10.2965		0.275476	MG1655 ALE-6
0.69	0.528	0.44	8.59	3.91	mmol/gDW /h	0.151727	MG1655 – ALE	Lacroix et al. (2015)	25304508
0.98	0.48	0.4	13.51	8.43		0.207994	MG1655 – ALE
0.96	0.528	0.44	12.19	7.89		0.215751	MG1655 – ALE
0.93	0.48	0.4	12.77	7.11		0.185591	MG1655 – ALE
1.01	0.516	0.43	13.13	5.12		0.129982	MG1655 – ALE
0.97	0.588	0.49	11.01	3.97		0.120194	MG1655 – ALE
0.92	0.588	0.49	10.43	2.36		0.0754235	MG1655 – ALE
0.89	0.468	0.39	12.59	5.05		0.133704	MG1655 – ALE
0.92	0.468	0.39	13.13	6.99		0.177456	MG1655 – ALE
0.95	0.456	0.38	13.98	9.27		0.22103	MG1655 – ALE
0.79	0.641757		8.34	2.98	mmol/gDW /h	0.119105	REL606 - ALE, ancestor	Schuetz et al. (2012)	22556256
0.48	0.554003		5.87	1.11		0.0630324	REL606 - ALE
0.82	0.63783		8.71	2.89		0.110601	REL606 - ALE
0.55	0.642457		5.8	1.35		0.0775862	REL606 - ALE
0.87	0.647009		9.11	3.17		0.11599	REL606 - ALE
0.93	0.607009		10.38	4.21		0.135196	REL606 - ALE
0.83	0.632537		8.89	2.71		0.101612	REL606 - ALE
0.85	0.641286		8.98	3.85		0.14291	REL606 - ALE
0.68	0.719844		6.4	1.18		0.0614583	REL606 - ALE
0.95	0.682529		9.43	2.71		0.0957936	REL606 - ALE
0.81	0.655645		8.37	2.64		0.105137	REL606 - ALE
0.59	0.729425	0.6	5.48	0		0	REL606 - ALE
0.58	0.624722	0.51	6.29	0		0	REL606 - ALE
0.54	0.64867	0.53	5.64	0		0	REL606 - ALE
0.62	0.624146	0.51	6.73	0		0	REL606 - ALE
0.86	0.805878	0.66	7.23	0		0	REL606 - ALE
0.98	0.491451		13.51	8.43	mmol/gDW /h	0.207994	MG1655 - ALE	Monk et al (2017)	29020004
0.96	0.533552		12.19	7.89		0.215751	MG1655 - ALE
0.93	0.493403		12.77	7.11		0.185591	MG1655 - ALE
1.01	0.521154		13.13	5.12		0.129982	MG1655 - ALE
0.97	0.596889		11.01	3.97		0.120194	MG1655 - ALE
0.92	0.597603		10.43	2.36		0.0754235	MG1655 - ALE
0.89	0.478932		12.59	5.05		0.133704	MG1655 - ALE
0.92	0.474714		13.13	6.99		0.177456	MG1655 - ALE
0.95	0.46039		13.98	9.27		0.22103	MG1655 - ALE
0.59	0.511812		7.81	3.26		0.139138	MG1655 - ALE
0.61	0.54811		7.54	2.72		0.120248	MG1655 - ALE
0.73	0.511453		9.67	3.49		0.120303	MG1655 - ALE
0.74	0.432	0.36	11.3	7.5	mmol/g DW /h	0.221239	BW25113	Renilla et al. (2012)	21881893
0.6	0.36	0.3					JM101	Sauer et al. (1999)	10542169
0.65	0.348	0.29					ATCC 11303
0.65	0.576	0.48	7.6	4.8	mmol/gDW /h	0.210526	BW25113	Perrenoud (2005)	15838044
0.6	0.552	0.46	7.2	3.5		0.162037	BW25113 - mutant
0.61	0.54	0.45	7.4	4.9		0.220721	BW25113 - mutant
0.65	0.528	0.44	8.1	5.7		0.234568	BW25113 - mutant
0.25	0.672	0.56	2.5	0.7		0.0933333	BW25113 - mutant
0.27	0.672	0.56	2.7	0.8		0.0987654	BW25113 - mutant
0.61	0.528	0.44	7.7	4.8		0.207792	BW25113 - mutant
0.6	0.564	0.47	7.1	4.3		0.201878	BW25113 - mutant
0.7	0.528	0.44	8.8	5.7	mmol/gDW/h	0.215909	BW25113	Gonzalez et al. (2017)	27840237
0.66	0.430667						MG1655 WT	Waegeman et al. (2011)	21481254
0.6	0.466667						MG1566 - mutant
0.61	0.573333						MG1566 - mutant
0.44	0.630667						MG1566 - mutant
0.63	0.489478		8.72	2.891	mmol/gDW /h	0.110512	MG1655	Esquerre et al. (2014)	24243845
0.71	0.468	0.39					MG1655	Crown et al. (2015)	25596508
0.7	0.48	0.4					MG1655
0.73	0.432	0.36					MG1655
0.75	0.42	0.35					MG1655
0.73	0.468	0.39					MG1655
0.68	0.468	0.39					MG1655
0.73	0.456	0.38					MG1655
0.72	0.444	0.37					MG1655
0.61	0.468	0.39			mmol/gDW /h		MG1655	Fischer and Sauer (2003)	12603321
0.55	0.492	0.41					W3110
0.69	0.588	0.49					JM101
0.68	0.636	0.53					K10 - mutant
0.17	0.468	0.39					W3110 - mutant
0.08	0.492	0.41					K10 - mutant
0.6	0.492	0.41					JM101 - mutant
0.41	0.48	0.4					K12 - mutant
0.5	0.516	0.43					MG1655 - mutant
0.67	0.552	0.46					K12 - mutant
0.69	0.541477		51.8		Cmmol/gDW/h		JM101 WT	Martinez-Gomez et al (2012)	22513097
0.62	0.497101		50.7				JM101 mutant
0.68	0.545207		50.7				JM101 mutant
0.71	0.529569		54.5				JM101 mutant

## Sheet: Chemostat
Growth rate (1/h)	Yield	Biomass Yield (gDW/g_glucose)	Glucose uptake rate	Acetate secretion rate	Normalized acetate overflow rate	Flux unit	Strain	Reference	PMID
0.21	0.534868		2.66			mmol/gDW/h	BW2113	Peebo et al. (2015)	25712329
0.36	0.559404		4.36				BW2113
0.51	0.553726		6.24				BW2113
0.2	0.408	0.34	3.1	0		mmol/gDW/h	BW25113	Renilla et al. (2012)	21881893
0.0436526	0.325522	0.271268					MG1655	Nanchen et al. (2006)	16461663
0.047216	0.405005	0.337504					MG1655
0.047216	0.275069	0.229224					MG1655
0.0579065	0.339252	0.28271					MG1655
0.0846325	0.343023	0.285852					MG1655
0.0962138	0.382746	0.318955					MG1655
0.110468	0.433165	0.360971					MG1655
0.114031	0.388062	0.323385					MG1655
0.121158	0.423972	0.35331					MG1655
0.187973	0.44601	0.371675					MG1655
0.205791	0.449798	0.374832					MG1655
0.212027	0.458194	0.381828					MG1655
0.285969	0.451173	0.375978					MG1655
0.301114	0.460316	0.383597					MG1655
0.315367	0.457232	0.381026					MG1655
0.398218	0.475417	0.396181					MG1655
0.405345	0.482283	0.401902					MG1655
0.408909	0.470047	0.391706					MG1655
0.512249	0.502715	0.41893					MG1655
0.547884	0.502647	0.418873					MG1655
0.587082	0.497986	0.414989					MG1655
0.692205	0.450397	0.375331					MG1655
0.24	0.48	0.4					MG1655	Valgepea et al. (2010)	21122111
0.3	0.492	0.41					MG1655
0.4	0.504	0.42					MG1655
0.51	0.492	0.41					MG1655
0.11021	0.498178	0.415148					MG1655	Valgepea et al. (2011)	21726468
0.120268	0.483972	0.40331					MG1655
0.13034	0.483983	0.403319					MG1655
0.140052	0.483994	0.403328					MG1655
0.150126	0.486036	0.40503					MG1655
0.160199	0.487063	0.405886					MG1655
0.169917	0.49266	0.41055					MG1655
0.179992	0.495717	0.413098					MG1655
0.200132	0.492186	0.410155					MG1655
0.190063	0.495221	0.412684					MG1655
0.210192	0.480011	0.400009					MG1655
0.220258	0.473929	0.394941					MG1655
0.229969	0.472925	0.394104					MG1655
0.240042	0.474459	0.395383					MG1655
0.250117	0.477517	0.397931					MG1655
0.260194	0.482606	0.402172					MG1655
0.270268	0.484141	0.403451					MG1655
0.280344	0.488722	0.407268					MG1655
0.290058	0.489749	0.408124					MG1655
0.30013	0.490268	0.408556					MG1655
0.310205	0.492818	0.410682					MG1655
0.320278	0.493845	0.411537					MG1655
0.330352	0.495887	0.413239					MG1655
0.340426	0.498437	0.415364					MG1655
0.350139	0.499464	0.41622					MG1655
0.360214	0.502014	0.418345					MG1655
0.370289	0.50558	0.421316					MG1655
0.380364	0.50813	0.423441					MG1655
0.390074	0.505602	0.421335					MG1655
0.400146	0.506121	0.421768					MG1655
0.410216	0.504609	0.420508					MG1655
0.420289	0.505128	0.42094					MG1655
0.430358	0.502601	0.418834					MG1655
0.440426	0.49855	0.415458					MG1655
0.450494	0.493992	0.41166					MG1655
0.460563	0.491464	0.409554					MG1655
0.470632	0.488937	0.407447					MG1655
0.1	0.510919	0.425766	9.03226			Cmmol/gDW/h	MG1655	Folsom et al. (2014)	24837288
0.2	0.626353	0.521961	14.1935				MG1655
0.3	0.546839	0.455699	25.3763				MG1655
0.4	0.547691	0.456409	33.9785				MG1655
0.0512914	0.501801	0.418168	0.122657			g/gDW/h	MG1655	Vemuri et al. (2006)	16672514
0.101251	0.559446	0.466205	0.21718				MG1655
0.191343	0.590179	0.491816	0.389054				MG1655
0.297235	0.590856	0.49238	0.603668				MG1655
0.410332	0.580453	0.483711	0.848301				MG1655
0.492398	0.551093	0.459244	1.07219				MG1655
0.597487	0.50507	0.420892	1.41958				MG1655
0.0438625	0.612	0.51	0.0865656			g/gDW/h	TG1	Kayser et al. (2005)	15758216
0.0654664	0.612	0.51	0.132859				TG1
0.134206	0.636	0.53	0.253686				TG1
0.149918	0.624	0.52	0.287901				TG1
0.169558	0.624	0.52	0.326152				TG1
0.202291	0.648	0.54	0.374509				TG1
0.264484	0.636	0.53	0.503336				TG1
0.279542	0.66	0.55	0.507427				TG1
0.299182	0.66	0.55	0.543671				TG1
0.346318	0.684	0.57	0.604148				TG1
0.373813	0.708	0.59	0.642439				TG1
0.388216	0.72	0.6	0.642511				TG1
0.396072	0.66	0.55	0.72488				TG1
0.0623656	0.329571		1.28205			mmol/gDW/h	W3110	Varma and Palsson (1994)	7986045
0.191398	0.404577		3.20513				W3110
0.249462	0.454581		3.71795				W3110
0.277419	0.458132		4.10256				W3110
0.270968	0.367161		5				W3110
0.350538	0.457387		5.19231				W3110
0.389247	0.442361		5.96154				W3110
0.447312	0.425913		7.11538				W3110
0.498925	0.466649		7.24359				W3110
0.483871	0.433393		7.5641				W3110
0.621505	0.479466		8.78205				W3110
0.690323	0.426668		10.9615				W3110
0.35	0.64						W3550	Paalme et al. (1995)	11.1016/0167-7012(95)00064-X
0.5	0.63						W3550
0.2	0.48	0.4	2.8	0	0	mmol/gDW/h	MG1655	Sauer et al. (1999)	10542169
0.3	0.552	0.46					MG1655	Franchini et al. (2015)	26204448
0.3	0.444	0.37					MG1655 - mutant
0.16	0.396	0.33					MG1655 - mutant
0.14	0.372	0.31					MG1655 - mutant
0.0511724	0.502268	0.418557		0		mmol/gDW/h	MG1655	Vemuri et al. (2006)	16672514
0.100414	0.560412	0.46701		0			MG1655
0.191172	0.590103	0.491753		0			MG1655
0.296414	0.590103	0.491753		0			MG1655
0.410345	0.581443	0.484536		0.20968			MG1655
0.494345	0.55299	0.460825		2.79574			MG1655
0.598621	0.505979	0.421649		9.17351			MG1655
0.1	0.463126						MG1655 WT	Waegeman et al. (2011)	21481254
0.12	0.424886						MG1655 - mutant
0.09	0.425948						MG1655 - mutant
0.093	0.524734						MG1655 - mutant
0.1	0.423437		1.6			mmol/gDW/h	MG1655	Esquerre et al. (2014)	24243845
0.2	0.435691		3.11				MG1655
0.3	0.458804		4.43				MG1655
0.39	0.511074		5.17				MG1655
0.23	0.564	0.47	2.7	0	0	mmol/gDW/h	BW25113 -WT	Castano-Cerezo et al. (2014)	25518064
0.19	0.348	0.29	3.68	0.63	0.0570652		BW25113 - mutant
0.23	0.576	0.48	2.64	0	0		BW25113 - mutant
0.19	0.492	0.41	2.55	0.62	0.0810458		BW25113 - mutant
0.23	0.54	0.45	2.85	0	0		BW25113 - mutant
