# Supplementary material for: Resource allocation accounts for the large variability of rate-yield phenotypes across bacterial strains
Source: eLife. 2023 May 31;12:e79815. doi: 10.7554/eLife.79815 (PMC10270689; doi:10.7554/eLife.79815)
Supplement: Supplementary file 2. [file elife-79815-supp2.xlsx]

## Sheet: Description
Supplementary file S2 : Reported rate-yield pairs for different E. coli strains grown on glycerol minimal medium, in batch culture

## Sheet: Batch
Growth rate (1/h)	Yield	Glycerol uptake rate	Acetate outflow rate	Rate unit	Strain	Reference	PMID
0.49	0.587566	33.9		Cmmol/gDW/h	BW25113	Gerosa et al. (2015)	27136056
0.45	0.549324	33.3		Cmmol/gDW/h	JM101 - mutant	Martinez-Goméz et al. (2012)	22513097
0.44	0.503831	35.5			JM101 - mutant
0.49	0.580714	34.3			JM101 - WT
0.46	0.617129	30.3			JM101 - mutant
0.46	0.59551	31.4			JM101 - mutant
0.44	0.72121	24.8			JM101 - mutant
0.23	0.56			g L-1 h-1 OD600-1	MG1655 -WT	Cheng et al (2014)	24481126
0.365	0.65				MG1655 - mutant
0.87	0.67479				CP14	Andersen & von Meyenburg (1980)	6998942
0.23	0.375482	8.3	0.913	mmol/gDW/h	MG1655- WT	Conrad et al. (2010)	21057108
0.37	0.432198	11.6	0.812		MG1655 - mutant
0.37	0.443673	11.3	0.226		MG1655 - mutant
0.14	0.283134	6.7	1.072		MG1655 - mutant
0.25	0.33875	10	1.1		MG1655 - mutant
0.7	0.6775	14		mo/kg DW /h	ML308	Holms (1996)	8988566
0.72	0.568635	28	0.07	CmM OD-1 h-1	NCM3722	Basan et al. (2015)	26632588		theoretical estimation
0.442	0.535794	11.178	0	mmol/gDW/h	MG1655- WT	Monk et al. (2017)	29020004
0.733	0.539849	18.398	5.141		MG1655-ALE
0.73	0.532402	18.579	5.256		MG1655-ALE
0.767	0.577894	17.984	3.098		MG1655-ALE
0.749	0.549067	18.484	3.248		MG1655-ALE
0.441877	0.535634	11.1782	0	mmol/gDW/h	MG1655- WT	Sandberg et al. 2017	28455337
0.730378	0.532691	18.5785	5.2562		MG1655-ALE
0.748616	0.548797	18.4836	3.24815		MG1655-ALE
