# Supplementary material for: Resource allocation accounts for the large variability of rate-yield phenotypes across bacterial strains
Source: eLife. 2023 May 31;12:e79815. doi: 10.7554/eLife.79815 (PMC10270689; doi:10.7554/eLife.79815)
Supplement: Supplementary file 3. [file elife-79815-supp3.xlsx]

## Sheet: Description
Supplementary file 3 : Half-saturation constants for reactions in central carbon metabolism in E.coli

## Sheet: Glucose
	BW strain							NCM strain						MG strain
Metabolite	Gerosa et al. (µmol/gDW)	Gerosa(M)	Km* (M)	S/Km	geom mean			Park et al. (M)	S/Km	geom mean		Metabolite	McCloskey et al . (µmol/g)	McCloskey (M)	S/Km
1,3-bisphospho-D-glycerate	0.116827	3.97211e-05	5e-05	0.794422				0.00141	28.2			1,3-bisphospho-D-glycerate	NaN	NaN
2-oxoglutarate	1.46498	0.000498094	0.000514302	0.968485				0.000443	0.861362	2.94805		2-oxoglutarate	8.27465	0.00281338	5.47029	2.21201
alpha-D-galactose 1-phosphate	0.0444127	1.51003e-05	0.000606685	0.0248899	1.23748			NaN	NaN			alpha-D-galactose 1-phosphate	NaN	NaN
beta-D-glucose 6-phosphate	2.18307	0.000742244	0.000534	1.38997				0.00787747	14.7518			beta-D-glucose 6-phosphate	5.85227	0.00198977	3.72616
citrate	1.61658	0.000549638	0.000599347	0.917062				0.00196	3.27022			citrate	0.692697	0.000235517	0.392956
D-erythrose 4-phosphate	0.0612646	2.083e-05	0.000156134	0.133411				4.90084e-05	0.313887			D-erythrose 4-phosphate	NaN
D-gluconate 6-phosphate	0.640639	0.000217817	0.000492	0.442718				0.00377	7.6626			D-gluconate 6-phosphate	0.965655	0.000328323	0.667322
D-ribose 5-phosphate	0.529526	0.000180039	0.00105018	0.171437				0.000786595	0.749011			D-ribose 5-phosphate	0.411309	0.000139845	0.133163
D-ribulose 5-phosphate	1.51514	0.000515147	0.00035251	1.46137				0.000112347	0.318705			D-ribulose 5-phosphate	1.14109	0.00038797	1.1006
D-sedoheptulose 7-phosphate	8.27153	0.00281232	0.00139051	2.02251				0.000882248	0.634478			D-sedoheptulose 7-phosphate	0.875967	0.000297829	0.214187
D-xylulose 5-phosphate	1.36761	0.000464988	0.00016	2.90618				0.000180589	1.12868			D-xylulose 5-phosphate	NaN
fructose 1,6-bisphosphate	2.6702	0.000907869	2.97895e-05	30.4762				0.0152	510.247			fructose 1,6-bisphosphate	7.2559	0.002467	82.8147
fumarate	1.26096	0.000428725	0.000153417	2.79451				0.000288313	1.87928			fumarate	4.88424	0.00166064	10.8244
glycerone phosphate	3.03666	0.00103247	0.000463966	2.22531				0.00306211	6.59987			glycerone phosphate	9.61983	0.00327074	7.04954
malate	3.87629	0.00131794	0.000548246	2.40392				0.00168	3.06432			malate	1.58303	0.000538229	0.981729
phosphoenolpyruvate	0.812263	0.000276169	5.26149e-05	5.24888				0.000184	3.49711			phosphoenolpyruvate	0.235205	7.99698e-05	1.51991
pyruvate	3.23185	0.00109883	0.00128248	0.856801				0.00366493	2.85769			pyruvate	4.4653	0.0015182	1.1838
sn-glycerol 3-phosphate	0.24696	8.39664e-05	0.000198797	0.422373				4.9e-05	0.246483			sn-glycerol 3-phosphate	1.84101	0.000625945	3.14866
succinate	2.72625	0.000926924	4.62931e-05	20.023				0.000569	12.2913			succinate	3.42937	0.00116599	25.1871
* Km values are extracted from Dourado et al. (2021)												* Km values are extracted from Dourado et al. (2021)

## Sheet: Glycerol
		BW strain
	Metabolite	Gerosa et al. (µmol/gDW)	Gerosa (M)	Km Dourado (M)	S/KM	Geom Mean
dhap	1,3-bisphospho-D-glycerate	0.0812269	2.76171e-05	5e-05	0.552343
g6p	2-oxoglutarate	0.95169	0.000323575	0.000514302	0.629153
6pgc	alpha-D-galactose 1-phosphate	0.0520064	1.76822e-05	0.000606685	0.0291456	0.721907
pep	beta-D-glucose 6-phosphate	0.614674	0.000208989	0.000534	0.391366
pyr	citrate	0.83849	0.000285087	0.000599347	0.475662
fdp	D-erythrose-4-phosphate	0.0483064	1.64242e-05	0.000156134	0.105193
e4p	D-fructose-1-6-bisphosphate	2.38695	0.000811564	2.97895e-05	27.2433
r5p	D-gluconate 6-phosphate	0.0644341	2.19076e-05	0.000492	0.0445276
ru5p-D	D-ribose 5-phosphate	0.118574	4.03151e-05	0.00105018	0.0383888
s7p	D-ribulose-5-phosphate	0.29639	0.000100773	0.00035251	0.285872
xu5p-D	D-xylulose-5-phosphate	0.28014	9.52477e-05	0.00016	0.595298
cit	fumarate	0.738039	0.000250933	0.000153417	1.63563
akg	glycerone phosphate	4.05391	0.00137833	0.000463966	2.97076
fum	malate	2.11719	0.000719843	0.000548246	1.31299
mal-L	phosphoenolpyruvate	0.718217	0.000244194	5.26149e-05	4.64115
succ	pyruvate	4.64765	0.0015802	0.00128248	1.23214
gal1p	sedoheptulose-7-phosphate	3.03707	0.00103261	0.00139051	0.742609
glyc3p	sn-glycerol 3-phosphate	2.70633	0.000920152	0.000198797	4.6286
13dpg	succinate	1.41404	0.000480772	4.62931e-05	10.3854
2ddg6p
f6p
icit
2pg+3pg
f1p
