# Supplementary material for: Resource allocation accounts for the large variability of rate-yield phenotypes across bacterial strains
Source: eLife. 2023 May 31;12:e79815. doi: 10.7554/eLife.79815 (PMC10270689; doi:10.7554/eLife.79815)
Supplement: Supplementary file 4. [file elife-79815-supp4.xlsx]

## Sheet: Description
Supplementary file S3 : Classification of energy proteins and estimation of respiration and fermentation protein fractions based on data from Schmidt et al. (2016)

## Sheet: COG
Uniprot Accession	Description	Gene	Functional group
P0A9G6	Isocitrate lyase OS=Escherichia coli (strain K12) GN=aceA PE=1 SV=1	aceA	Shared
P08997	Malate synthase A OS=Escherichia coli (strain K12) GN=aceB PE=1 SV=1	aceB	Co-Factor
P0AFG8	Pyruvate dehydrogenase E1 component OS=Escherichia coli (strain K12) GN=aceE PE=1 SV=2	aceE	Shared
P06959	Dihydrolipoyllysine-residue acetyltransferase component of pyruvate dehydrogenase complex OS=Escherichia coli (strain K12) GN=aceF PE=1 SV=3	aceF	Shared
P0A6A3	Acetate kinase OS=Escherichia coli (strain K12) GN=ackA PE=1 SV=1	ackA	Fermentation
P25516	Aconitate hydratase 1 OS=Escherichia coli (strain K12) GN=acnA PE=1 SV=3	acnA	TCA
P36683	Aconitate hydratase 2 OS=Escherichia coli (strain K12) GN=acnB PE=1 SV=3	acnB	TCA
P26646	Putative quinone oxidoreductase YhdH OS=Escherichia coli (strain K12) GN=yhdH PE=1 SV=1	acuI
P0A9Q7	Aldehyde-alcohol dehydrogenase OS=Escherichia coli (strain K12) GN=adhE PE=1 SV=2	adhE	Co-Factor
P25553	Lactaldehyde dehydrogenase OS=Escherichia coli (strain K12) GN=aldA PE=1 SV=2	aldA	Co-Factor
P37685	Aldehyde dehydrogenase B OS=Escherichia coli (strain K12) GN=aldB PE=1 SV=2	aldB
P26459	Cytochrome bd-II oxidase subunit 1 OS=Escherichia coli (strain K12) GN=appC PE=1 SV=1	appC	Co-Factor
P76217	N-succinylglutamate 5-semialdehyde dehydrogenase OS=Escherichia coli (strain K12) GN=astD PE=1 SV=1	astD
P0ABB0	ATP synthase subunit alpha OS=Escherichia coli (strain K12) GN=atpA PE=1 SV=1	atpA
P0AB98	ATP synthase subunit a OS=Escherichia coli (strain K12) GN=atpB PE=1 SV=1	atpB	Co-Factor
P0A6E6	ATP synthase epsilon chain OS=Escherichia coli (strain K12) GN=atpC PE=1 SV=2	atpC	Co-Factor
P0ABB4	ATP synthase subunit beta OS=Escherichia coli (strain K12) GN=atpD PE=1 SV=2	atpD	Co-Factor
P68699	ATP synthase subunit c OS=Escherichia coli (strain K12) GN=atpE PE=1 SV=1	atpE
P0ABA0	ATP synthase subunit b OS=Escherichia coli (strain K12) GN=atpF PE=1 SV=1	atpF	Co-Factor
P0ABA6	ATP synthase gamma chain OS=Escherichia coli (strain K12) GN=atpG PE=1 SV=1	atpG	Co-Factor
P0ABA4	ATP synthase subunit delta OS=Escherichia coli (strain K12) GN=atpH PE=1 SV=1	atpH	Co-Factor
P17445	Betaine aldehyde dehydrogenase OS=Escherichia coli (strain K12) GN=betB PE=1 SV=3	betB
P20099	Biotin sulfoxide reductase OS=Escherichia coli (strain K12) GN=bisC PE=3 SV=3	bisC
P0ABJ9	Cytochrome d ubiquinol oxidase subunit 1 OS=Escherichia coli (strain K12) GN=cydA PE=1 SV=1	cydA	Co-Factor
P0ABK2	Cytochrome d ubiquinol oxidase subunit 2 OS=Escherichia coli (strain K12) GN=cydB PE=1 SV=1	cydB	Co-Factor
P23886	ATP-binding/permease protein CydC OS=Escherichia coli (strain K12) GN=cydC PE=3 SV=2	cydC	Co-Factor
P29018	ATP-binding/permease protein CydD OS=Escherichia coli (strain K12) GN=cydD PE=1 SV=3	cydD	Co-Factor
P0ABJ1	Ubiquinol oxidase subunit 2 OS=Escherichia coli (strain K12) GN=cyoA PE=1 SV=1	cyoA	Co-Factor
P0ABI8	Ubiquinol oxidase subunit 1 OS=Escherichia coli (strain K12) GN=cyoB PE=1 SV=1	cyoB
P0ABJ3	Cytochrome o ubiquinol oxidase subunit 3 OS=Escherichia coli (strain K12) GN=cyoC PE=1 SV=1	cyoC	Co-Factor
P0ABJ6	Cytochrome o ubiquinol oxidase protein CyoD OS=Escherichia coli (strain K12) GN=cyoD PE=1 SV=1	cyoD	Co-Factor
P0A830	Aerobic C4-dicarboxylate transport protein OS=Escherichia coli (strain K12) GN=dctA PE=1 SV=1	dctA
P06149	D-lactate dehydrogenase OS=Escherichia coli (strain K12) GN=dld PE=1 SV=3	dld
P18775	Anaerobic dimethyl sulfoxide reductase chain A OS=Escherichia coli (strain K12) GN=dmsA PE=1 SV=2	dmsA
P42593	2,4-dienoyl-CoA reductase [NADPH] OS=Escherichia coli (strain K12) GN=fadH PE=1 SV=3	fadH
P32177	Protein FdhD OS=Escherichia coli (strain K12) GN=fdhD PE=3 SV=1	fdhD
P32176	Formate dehydrogenase-O major subunit OS=Escherichia coli (strain K12) GN=fdoG PE=1 SV=5	fdoG
P0AAJ5	Formate dehydrogenase-O iron-sulfur subunit OS=Escherichia coli (strain K12) GN=fdoH PE=1 SV=1	fdoH
P0AEL0	Formate dehydrogenase, cytochrome b556(fdo) subunit OS=Escherichia coli (strain K12) GN=fdoI PE=1 SV=1	fdoI
P0A9R4	2Fe-2S ferredoxin OS=Escherichia coli (strain K12) GN=fdx PE=1 SV=2	fdx
P80668	Phenylacetaldehyde dehydrogenase OS=Escherichia coli (strain K12) GN=feaB PE=1 SV=2	feaB
P61949	Flavodoxin-1 OS=Escherichia coli (strain K12) GN=fldA PE=1 SV=2	fldA	Co-Factor
P0ABY4	Flavodoxin-2 OS=Escherichia coli (strain K12) GN=fldB PE=3 SV=1	fldB
P28861	Ferredoxin--NADP reductase OS=Escherichia coli (strain K12) GN=fpr PE=1 SV=4	fpr
P00363	Fumarate reductase flavoprotein subunit OS=Escherichia coli (strain K12) GN=frdA PE=1 SV=3	frdA
P0AC47	Fumarate reductase iron-sulfur subunit OS=Escherichia coli (strain K12) GN=frdB PE=1 SV=2	frdB	Co-Factor
P25437	S-(hydroxymethyl)glutathione dehydrogenase OS=Escherichia coli (strain K12) GN=frmA PE=1 SV=3	frmA
P0A9S1	Lactaldehyde reductase OS=Escherichia coli (strain K12) GN=fucO PE=1 SV=1	fucO
P0AC33	Fumarate hydratase class I, aerobic OS=Escherichia coli (strain K12) GN=fumA PE=1 SV=2	fumA	TCA
P14407	Fumarate hydratase class I, anaerobic OS=Escherichia coli (strain K12) GN=fumB PE=1 SV=2	fumB	TCA
P05042	Fumarate hydratase class II OS=Escherichia coli (strain K12) GN=fumC PE=1 SV=1	fumC	TCA
P25526	Succinate-semialdehyde dehydrogenase [NADP+] OS=Escherichia coli (strain K12) GN=gabD PE=1 SV=1	gabD
P09148	Galactose-1-phosphate uridylyltransferase OS=Escherichia coli (strain K12) GN=galT PE=1 SV=2	galT
P37666	Glyoxylate/hydroxypyruvate reductase B OS=Escherichia coli (strain K12) GN=ghrB PE=1 SV=3	ghrB	Co-Factor
Q46839	Glycolate permease glcA OS=Escherichia coli (strain K12) GN=glcA PE=1 SV=1	glcA
P37330	Malate synthase G OS=Escherichia coli (strain K12) GN=glcB PE=1 SV=3	glcB
P0AEP9	Glycolate oxidase subunit glcD OS=Escherichia coli (strain K12) GN=glcD PE=3 SV=1	glcD
P52073	Glycolate oxidase subunit glcE OS=Escherichia coli (strain K12) GN=glcE PE=4 SV=1	glcE
P52074	Glycolate oxidase iron-sulfur subunit OS=Escherichia coli (strain K12) GN=glcF PE=4 SV=1	glcF
P0A9S5	Glycerol dehydrogenase OS=Escherichia coli (strain K12) GN=gldA PE=1 SV=1	gldA
P0A9C0	Anaerobic glycerol-3-phosphate dehydrogenase subunit A OS=Escherichia coli (strain K12) GN=glpA PE=1 SV=1	glpA
P0A996	Anaerobic glycerol-3-phosphate dehydrogenase subunit C OS=Escherichia coli (strain K12) GN=glpC PE=1 SV=1	glpC
P13035	Aerobic glycerol-3-phosphate dehydrogenase OS=Escherichia coli (strain K12) GN=glpD PE=1 SV=3	glpD
P0A6F3	Glycerol kinase OS=Escherichia coli (strain K12) GN=glpK PE=1 SV=2	glpK
P09394	Glycerophosphoryl diester phosphodiesterase OS=Escherichia coli (strain K12) GN=glpQ PE=1 SV=2	glpQ
P0ABH7	Citrate synthase OS=Escherichia coli (strain K12) GN=gltA PE=1 SV=1	gltA	TCA
P21345	Proton glutamate symport protein OS=Escherichia coli (strain K12) GN=gltP PE=1 SV=2	gltP
P06715	Glutathione reductase OS=Escherichia coli (strain K12) GN=gor PE=1 SV=1	gor
Q46851	Uncharacterized protein yghZ OS=Escherichia coli (strain K12) GN=yghZ PE=1 SV=1	gpr
P0A6S7	Glycerol-3-phosphate dehydrogenase [NAD(P)+] OS=Escherichia coli (strain K12) GN=gpsA PE=3 SV=1	gpsA
P0ACB4	Protoporphyrinogen IX dehydrogenase [menaquinone] OS=Escherichia coli (strain K12) GN=hemG PE=1 SV=1	hemG
P24232	Flavohemoprotein OS=Escherichia coli (strain K12) GN=hmp PE=1 SV=1	hmp
P69739	Hydrogenase-1 small chain OS=Escherichia coli (strain K12) GN=hyaA PE=1 SV=1	hyaA
P0ACD8	Hydrogenase-1 large chain OS=Escherichia coli (strain K12) GN=hyaB PE=1 SV=1	hyaB
P0AAJ8	Hydrogenase-2 operon protein hybA OS=Escherichia coli (strain K12) GN=hybA PE=3 SV=1	hybA
P0ACE0	Hydrogenase-2 large chain OS=Escherichia coli (strain K12) GN=hybC PE=1 SV=2	hybC
P37182	Hydrogenase 2 maturation protease OS=Escherichia coli (strain K12) GN=hybD PE=1 SV=2	hybD
P16431	Formate hydrogenlyase subunit 5 OS=Escherichia coli (strain K12) GN=hycE PE=1 SV=1	hycE
P0AEV9	Hydrogenase 3 maturation protease OS=Escherichia coli (strain K12) GN=hycI PE=1 SV=2	hycI
P08200	Isocitrate dehydrogenase [NADP] OS=Escherichia coli (strain K12) GN=icd PE=1 SV=1	icd	TCA
P0ACD4	NifU-like protein OS=Escherichia coli (strain K12) GN=nifU PE=1 SV=1	iscU	Co-Factor
P52643	D-lactate dehydrogenase OS=Escherichia coli (strain K12) GN=ldhA PE=1 SV=1	ldhA
P30125	3-isopropylmalate dehydrogenase OS=Escherichia coli (strain K12) GN=leuB PE=1 SV=3	leuB	Co-Factor
P33232	L-lactate dehydrogenase [cytochrome] OS=Escherichia coli (strain K12) GN=lldD PE=1 SV=1	lldD
P26616	NAD-dependent malic enzyme OS=Escherichia coli (strain K12) GN=maeA PE=1 SV=4	maeA	TCA
P76558	NADP-dependent malic enzyme OS=Escherichia coli (strain K12) GN=maeB PE=1 SV=1	maeB	TCA
P61889	Malate dehydrogenase OS=Escherichia coli (strain K12) GN=mdh PE=1 SV=1	mdh	TCA
P03817	Protein mioC OS=Escherichia coli (strain K12) GN=mioC PE=1 SV=4	mioC	Co-Factor
P33937	Periplasmic nitrate reductase OS=Escherichia coli (strain K12) GN=napA PE=1 SV=3	napA
P09152	Respiratory nitrate reductase 1 alpha chain OS=Escherichia coli (strain K12) GN=narG PE=1 SV=4	narG
P11349	Respiratory nitrate reductase 1 beta chain OS=Escherichia coli (strain K12) GN=narH PE=1 SV=3	narH
P11350	Respiratory nitrate reductase 1 gamma chain OS=Escherichia coli (strain K12) GN=narI PE=1 SV=1	narI
P0AF26	Nitrate reductase molybdenum cofactor assembly chaperone NarJ OS=Escherichia coli (strain K12) GN=narJ PE=1 SV=1	narJ
P00393	NADH dehydrogenase OS=Escherichia coli (strain K12) GN=ndh PE=1 SV=2	ndh	Co-Factor
P77258	N-ethylmaleimide reductase OS=Escherichia coli (strain K12) GN=nemA PE=1 SV=1	nemA
P17117	Oxygen-insensitive NADPH nitroreductase OS=Escherichia coli (strain K12) GN=nfsA PE=1 SV=2	nfsA
P08201	Nitrite reductase [NAD(P)H] large subunit OS=Escherichia coli (strain K12) GN=nirB PE=3 SV=4	nirB
P0AFC3	NADH-quinone oxidoreductase subunit A OS=Escherichia coli (strain K12) GN=nuoA PE=3 SV=1	nuoA	Co-Factor
P0AFC7	NADH-quinone oxidoreductase subunit B OS=Escherichia coli (strain K12) GN=nuoB PE=1 SV=1	nuoB	Co-Factor
P33599	NADH-quinone oxidoreductase subunit C/D OS=Escherichia coli (strain K12) GN=nuoC PE=1 SV=3	nuoC
P0AFD1	NADH-quinone oxidoreductase subunit E OS=Escherichia coli (strain K12) GN=nuoE PE=1 SV=1	nuoE	Co-Factor
P31979	NADH-quinone oxidoreductase subunit F OS=Escherichia coli (strain K12) GN=nuoF PE=1 SV=3	nuoF	Co-Factor
P33602	NADH-quinone oxidoreductase subunit G OS=Escherichia coli (strain K12) GN=nuoG PE=1 SV=4	nuoG
P0AFD4	NADH-quinone oxidoreductase subunit H OS=Escherichia coli (strain K12) GN=nuoH PE=1 SV=1	nuoH	Co-Factor
P0AFD6	NADH-quinone oxidoreductase subunit I OS=Escherichia coli (strain K12) GN=nuoI PE=1 SV=1	nuoI	Co-Factor
P0AFE4	NADH-quinone oxidoreductase subunit K OS=Escherichia coli (strain K12) GN=nuoK PE=1 SV=1	nuoK
P33607	NADH-quinone oxidoreductase subunit L OS=Escherichia coli (strain K12) GN=nuoL PE=1 SV=2	nuoL	Co-Factor
P0AFE8	NADH-quinone oxidoreductase subunit M OS=Escherichia coli (strain K12) GN=nuoM PE=1 SV=1	nuoM	Co-Factor
P0AFF0	NADH-quinone oxidoreductase subunit N OS=Escherichia coli (strain K12) GN=nuoN PE=1 SV=2	nuoN	Co-Factor
P76081	Probable phenylacetic acid degradation NADH oxidoreductase paaE OS=Escherichia coli (strain K12) GN=paaE PE=2 SV=1	paaE
P09373	Formate acetyltransferase 1 OS=Escherichia coli (strain K12) GN=pflB PE=1 SV=2	pflB	Co-Factor
P07001	NAD(P) transhydrogenase subunit alpha OS=Escherichia coli (strain K12) GN=pntA PE=1 SV=2	pntA
P0AB67	NAD(P) transhydrogenase subunit beta OS=Escherichia coli (strain K12) GN=pntB PE=1 SV=1	pntB	Co-Factor
P0A7A9	Inorganic pyrophosphatase OS=Escherichia coli (strain K12) GN=ppa PE=1 SV=2	ppa
P00864	Phosphoenolpyruvate carboxylase OS=Escherichia coli (strain K12) GN=ppc PE=1 SV=1	ppc	TCA
P0AEX5	Probable phosphoribulokinase OS=Escherichia coli (strain K12) GN=prkB PE=3 SV=1	prkB
P31660	2-methylcitrate synthase OS=Escherichia coli (strain K12) GN=prpC PE=1 SV=2	prpC
P77674	Gamma-aminobutyraldehyde dehydrogenase OS=Escherichia coli (strain K12) GN=prr PE=1 SV=1	prr
P09546	Bifunctional protein putA OS=Escherichia coli (strain K12) GN=putA PE=1 SV=3	putA
P23883	Gamma-glutamyl-gamma-aminobutyraldehyde dehydrogenase OS=Escherichia coli (strain K12) GN=puuC PE=3 SV=2	puuC
P28304	Quinone oxidoreductase 1 OS=Escherichia coli (strain K12) GN=qorA PE=1 SV=1	qorA	Co-Factor
P77212	Probable pyridine nucleotide-disulfide oxidoreductase ykgC OS=Escherichia coli (strain K12) GN=ykgC PE=3 SV=2	rclA
P77611	Electron transport complex protein rnfC OS=Escherichia coli (strain K12) GN=rnfC PE=3 SV=1	rsxC
P77285	Electron transport complex protein rnfG OS=Escherichia coli (strain K12) GN=rnfG PE=3 SV=1	rsxG
P76149	Aldehyde dehydrogenase-like protein yneI OS=Escherichia coli (strain K12) GN=yneI PE=1 SV=2	sad
P0AC41	Succinate dehydrogenase flavoprotein subunit OS=Escherichia coli (strain K12) GN=sdhA PE=1 SV=1	sdhA	TCA
P07014	Succinate dehydrogenase iron-sulfur subunit OS=Escherichia coli (strain K12) GN=sdhB PE=1 SV=1	sdhB	TCA
P69054	Succinate dehydrogenase cytochrome b556 subunit OS=Escherichia coli (strain K12) GN=sdhC PE=1 SV=1	sdhC	TCA
P0AC44	Succinate dehydrogenase hydrophobic membrane anchor subunit OS=Escherichia coli (strain K12) GN=sdhD PE=1 SV=1	sdhD	TCA
P27306	Soluble pyridine nucleotide transhydrogenase OS=Escherichia coli (strain K12) GN=sthA PE=1 SV=5	sthA
P0AFG3	2-oxoglutarate dehydrogenase E1 component OS=Escherichia coli (strain K12) GN=sucA PE=1 SV=1	sucA	TCA
P0AFG6	Dihydrolipoyllysine-residue succinyltransferase component of 2-oxoglutarate dehydrogenase complex OS=Escherichia coli (strain K12) GN=sucB PE=1 SV=2	sucB	TCA
P0A836	Succinyl-CoA ligase [ADP-forming] subunit beta OS=Escherichia coli (strain K12) GN=sucC PE=1 SV=1	sucC	TCA
P0AGE9	Succinyl-CoA ligase [ADP-forming] subunit alpha OS=Escherichia coli (strain K12) GN=sucD PE=1 SV=2	sucD
P0A9T4	Protein tas OS=Escherichia coli (strain K12) GN=tas PE=1 SV=1	tas
P42632	Keto-acid formate acetyltransferase OS=Escherichia coli (strain K12) GN=tdcE PE=1 SV=2	tdcE
P10908	Glycerophosphoryl diester phosphodiesterase OS=Escherichia coli (strain K12) GN=ugpQ PE=1 SV=1	ugpQ
Q46800	Xanthine dehydrogenase FAD-binding subunit OS=Escherichia coli (strain K12) GN=xdhB PE=3 SV=1	xdhB
Q46801	Xanthine dehydrogenase iron-sulfur-binding subunit OS=Escherichia coli (strain K12) GN=xdhC PE=3 SV=1	xdhC
P77735	Uncharacterized oxidoreductase YajO OS=Escherichia coli (strain K12) GN=yajO PE=3 SV=2	yajO
P45579	Uncharacterized oxidoreductase YbdH OS=Escherichia coli (strain K12) GN=ybdH PE=3 SV=2	ybdH	Co-Factor
P30178	Uncharacterized oxidoreductase ybiC OS=Escherichia coli (strain K12) GN=ybiC PE=1 SV=2	ybiC	Co-Factor
P0AB65	Acylphosphatase OS=Escherichia coli (strain K12) GN=yccX PE=1 SV=1	yccX
P25906	Putative oxidoreductase YdbC OS=Escherichia coli (strain K12) GN=ydbC PE=1 SV=1	ydbC
P52647	Probable pyruvate-flavodoxin oxidoreductase OS=Escherichia coli (strain K12) GN=ydbK PE=3 SV=2	ydbK
P77561	Protein ydeP OS=Escherichia coli (strain K12) GN=ydeP PE=1 SV=1	ydeP
P77748	Uncharacterized protein ydiJ OS=Escherichia coli (strain K12) GN=ydiJ PE=4 SV=1	ydiJ
P0ACY1	Putative NAD(P)H nitroreductase ydjA OS=Escherichia coli (strain K12) GN=ydjA PE=1 SV=1	ydjA	Co-Factor
P76594	Uncharacterized protein yfiQ OS=Escherichia coli (strain K12) GN=yfiQ PE=4 SV=1	yfiQ
P0A8P3	Probable Fe(2+)-trafficking protein OS=Escherichia coli (strain K12) GN=yggX PE=1 SV=2	yggX	Co-Factor
Q46861	UPF0313 protein ygiQ OS=Escherichia coli (strain K12) GN=ygiQ PE=3 SV=3	ygiQ
P0ADV5	Uncharacterized protein yhbW OS=Escherichia coli (strain K12) GN=yhbW PE=4 SV=1	yhbW
P0ADK6	Protein yibA OS=Escherichia coli (strain K12) GN=yibA PE=1 SV=1	yibA
P77252	Uncharacterized protein ykgE OS=Escherichia coli (strain K12) GN=ykgE PE=3 SV=1	ykgE
P77783	Probable dimethyl sulfoxide reductase chain ynfF OS=Escherichia coli (strain K12) GN=ynfF PE=3 SV=4	ynfF
P65367	Uncharacterized protein yqcA OS=Escherichia coli (strain K12) GN=yqcA PE=3 SV=1	yqcA
Q46856	Alcohol dehydrogenase YqhD OS=Escherichia coli (strain K12) GN=yqhD PE=1 SV=1	yqhD

## Sheet: BW
		Protein Mass (fg) / Cell																													Functional Annotation using cluster of orthologues groups (COG)
Gene	Functional group	Glucose	Glycerol	Chemostat µ=0.5	Chemostat µ=0.35	Chemostat µ=0.20
mdh	TCA	2.84997	3.53862	3.83263	3.24194	2.63007
icd	TCA	2.55564	1.86652	2.31742	2.08221	1.68506
aceA	Shared	2.22094	5.90511	8.63434	14.5183	15.839
atpD	Co-Factor	2.01662	2.20805	2.00655	1.66915	1.2217
atpA	Co-Factor	1.33315	1.64671	1.51063	1.23232	0.985843
atpC	Co-Factor	0.252562	0.299922	0.211604	0.177357	0.134917
gltA	TCA	0.770315	1.40193	2.52202	2.12466	2.11303
iscU	Co-Factor	0.216462	0.206725	0.232996	0.156188	0.110848
aceF	Shared	0.9932	0.619484	0.774879	0.691078	0.564076
atpF	Co-Factor	0.257229	0.284933	0.217443	0.1701	0.124124
fldA	Co-Factor	0.283095	0.261423	0.185997	0.149941	0.132447
ppa	Co-Factor	0.272759	0.247322	0.193441	0.176498	0.145333
atpH	Co-Factor	0.24681	0.25453	0.217337	0.181224	0.138858
acnB	TCA	1.17828	1.67417	2.44067	3.14307	2.54559
sucD	TCA	0.341942	0.628598	0.763917	0.646516	0.511209
sucC	TCA	0.426611	0.801452	1.06346	0.882796	0.715842
aceE	Shared	0.961555	0.672533	0.973	0.872379	0.729118
sucB	TCA	0.383434	0.405758	0.445135	0.370838	0.297695
adhE	Co-Factor	0.773707	0.827061	1.65134	1.21811	1.25001
pflB	Co-Factor	0.653571	0.830281	0.946536	0.85029	0.772432
leuB	Co-Factor	0.300735	0.329811	0.357569	0.405402	0.412569
aceB	Co-Factor	0.439227	0.830772	1.14735	1.55379	1.68812
mioC	Co-Factor	0.109257	0.0868672	0.0643143	0.0512023	0.0395985
ppc	TCA	0.597077	0.359211	0.704721	0.471901	0.349911
aldA	Co-Factor	0.303624	1.42283	1.65243	2.68921	3.09755
yggX	Co-Factor	0.0625264	0.0506094	0.0409156	0.0354791	0.0320832
ackA	Fermentation	0.219862	0.185751	0.144047	0.144953	0.145654
pntB	Co-Factor	0.240595	0.17442	0.300734	0.2048	0.178353
fdx		0.056026	0.05166	0.0386364	0.0374183	0.0274988
cyoA	Co-Factor	0.151456	0.127729	0.197147	0.128978	0.0994655
sdhB	TCA	0.11016	0.147924	0.174868	0.187263	0.158623
atpG	Co-Factor	0.1208	0.12642	0.128301	0.0954662	0.0740178
sdhA	TCA	0.222577	0.333232	0.677716	0.624188	0.560769
ydjA	Co-Factor	0.0669612	0.0680014	0.0607778	0.0501208	0.0464966
pntA	Co-Factor	0.175659	0.122257	0.241718	0.177556	0.134026
ghrB	Co-Factor	0.104953	0.0678379	0.0729737	0.0463264	0.0373326
sucA	TCA	0.297368	0.479783	0.634537	0.491005	0.40492
ybiC	Co-Factor	0.105424	0.03942	0.0583584	0.0432409	0.0321676
fumA	TCA	0.135198	0.252348	0.471359	0.372651	0.233744
atpB	Co-Factor	0.058056	0.105976	0.141848	0.102248	0.0680161
acuI	Co-Factor	0.0631535	0.08003	0.0619844	0.0710868	0.0720436
yqhD	Co-Factor	0.0734483	0.11327	0.0467566	0.0249581	0.0245684
gor	Co-Factor	0.0797605	0.0806216	0.0764135	0.0691176	0.0626995
cyoB	Co-Factor	0.118015	0.114561	0.180928	0.139845	0.110534
nuoC	Co-Factor	0.105879	0.184655	0.197347	0.178711	0.169967
nuoG	Co-Factor	0.155352	0.244082	0.251351	0.250438	0.212102
qorA	Co-Factor	0.0508354	0.072895	0.0529107	0.0632059	0.0732504
sdhC	TCA	0.0203834	0.0249456	0.0616369	0.0564276	0.0450345
nuoE	Co-Factor	0.0230517	0.0430758	0.0331599	0.0410086	0.0397876
ybdH	Co-Factor	0.0471558	0.0426399	0.0373038	0.0208226	0.0252645
gabD		0.0616423	0.0971521	0.134254	0.144563	0.139202
fldB		0.0225384	0.00891018	0.00640075	0.00511677	0.00260372
ndh	Co-Factor	0.0520448	0.0348716	0.0513713	0.0260407	0.0262407
dld		0.0651925	0.0597003	0.0707239	0.0668786	0.055852
acnA	TCA	0.0964854	0.130967	0.158895	0.210343	0.235316
aldB		0.0549779	0.0985074	0.131178	0.290787	0.440397
ldhA		0.0342864	0.0314382	0.0388489	0.0344193	0.0339324
frmA		0.0359454	0.0438433	0.0300831	0.0265385	0.0241455
maeA	TCA	0.055391	0.0504366	0.0559398	0.0386636	0.0304058
fumC	TCA	0.0417285	0.0474728	0.113727	0.138114	0.141815
glpK		0.0462663	2.59867	0.0792297	0.106368	0.100884
prpC		0.033609	0.0214965	0.0177722	0.0704103	0.0780525
maeB	TCA	0.0641063	0.155018	0.386853	0.414303	0.391072
yajO		0.0280683	0.0348569	0.0257201	0.0285079	0.0315946
sthA		0.0380228	0.0872651	0.175187	0.132877	0.10573
nuoA	Co-Factor	0.0119094	0.0201611	0.0327495	0.0254505	0.0226949
ydbC		0.0210573	0.0307105	0.0350998	0.0445258	0.0465807
nuoF	Co-Factor	0.0321685	0.0702299	0.0770272	0.076132	0.081059
cydA	Co-Factor	0.0332566	0.050048	0.0720946	0.0745255	0.0852365
gpsA		0.0196984	0.0181527	0.0197194	0.0182725	0.0165053
prr		0.0263634	0.106507	0.0821559	0.145701	0.193622
nuoB	Co-Factor	0.012682	0.0214897	0.0181916	0.0170815	0.016083
nuoI	Co-Factor	0.0100163	0.0160356	0.0121405	0.0131887	0.0124688
atpE		0.0039094	0.00514227	0.00262266	0.0030878	0.00247631
glcB		0.0377015	0.102382	0.111534	0.20759	0.232557
tas		0.0155026	0.0140794	0.0100058	0.00835243	0.00871862
ydiJ		0.0434225	0.0470438	0.0515598	0.0560667	0.0489045
nuoK		0.00412259	0.00899485	0.00479498	0.00392339	0.00323222
nfsA		0.00938577	0.00747438	0.00699048	0.00533235	0.00381036
ugpQ		0.00884762	0.0114434	0.00985442	0.0106152	0.0118563
fpr		0.00846817	0.00592816	0.00479335	0.00494404	0.00428856
prkB		0.00927247	0.0156119	0.0156159	0.0131351	0.0152915
gpr		0.010771	0.0214488	0.0334996	0.0404752	0.0397891
frdB	Co-Factor	0.00741024	0.0068911	0.00715596	0.011111	0.0106413
glpQ		0.0111238	0.042248	0.00729521	0.00596315	0.00475396
yqcA		0.0042239	0.00362794	0.00379677	0.00582312	0.00523585
galT		0.00990655	0.00966756	0.00718861	0.00753906	0.00599902
hmp		0.0108323	0.0060894	0.0105006	0.00723373	0.00518526
hybA		0.00882876	0.00201636	0.00272263	0.000740998	0.000258201
lldD		0.0104712	0.0192905	0.0261674	0.0238757	0.0218715
cyoD	Co-Factor	0.0027127	0.000662564	0.0012165	0.000770163	0.00135031
glpD		0.0127313	0.559803	0.00974601	0.00941449	0.00935301
nuoH	Co-Factor	0.00798288	0.00911561	0.0168012	0.013018	0.0100127
putA		0.0306319	0.0320746	0.040292	0.0359434	0.0257139
yccX		0.00201214	0.00514241	0.00502706	0.0059187	0.00768459
puuC		0.0102472	0.00640956	0.034632	0.0504752	0.0202611
yhbW		0.00679734	0.00600531	0.0027219	0.00206985	0.00239078
hemG		0.00371359	0.0053395	0.00502409	0.00477355	0.0039893
nemA		0.00650397	0.0057285	0.00397925	0.00261271	0.00168598
rsxG		0.00327869	0.00297648	0.00323191	0.00248941	0.00255646
betB		0.00749861	0.00553208	0.00535095	0.00416932	0.00348106
cydC	Co-Factor	0.00802253	0.0107244	0.0141693	0.0119449	0.0103134
ydbK		0.0139919	0.0128952	0.0133205	0.0125373	0.014007
cydD		0.00649147	0.0055982	0.00897692	0.00714709	0.0048583
gldA	Co-Factor	0.0034379	0.00228108	0.00300811	0.00337235	0.00404154
fadH		0.00515463	0.0135605	0.0166698	0.0218071	0.0238599
cydB	Co-Factor	0.00300425	0.00474397	0.00974359	0.00929248	0.010847
fucO		0.00278745	0.00561061	0.0061039	0.0103507	0.0131176
dctA		0.00277517	0.00734306	0.0193131	0.0303671	0.0425397
frdA		0.00400058	0.00670186	0.00938642	0.0109977	0.0102994
glcD		0.00298745	0.00206957	0.00164741	0.00142545	0.00116592
yibA		0.00165032	0.00353029	0.000711327	0.000468553	0.00046243
bisC		0.004389	0.00349767	0.00156578	0.00128396	0.00117349
tdcE		0.00434594	0.000153056	0.00103594	6.90772e-05	4.2626e-05
sdhD	TCA	0.000626119	0.000638859	0.000779404	0.000832782	0.000692424
nuoN	Co-Factor	0.00173026	0.00608059	0.00942116	0.00698131	0.00603191
rclA		0.00145136	0.00140236	0.00185106	0.00286365	0.00411714
cyoC	Co-Factor	0.000672893	0.00112588	0.00286957	0.0015945	0.00203717
yfiQ		0.00280436	0.00384981	0.00796886	0.0114919	0.0159993
sad		0.00141299	0.00210489	0.00126691	0.000673107	0.00105378
fumB	TCA	0.00152834	0.000465491	0.000347894	5.33634e-05	0.000411254
hybD		0.000428413	4.20863e-05	0.000118148	0.000513148	0.000190888
glpA		0.00139148	0.0465424	0.00281086	0.00163785	0.00197722
fdoG		0.0024358	0.00157716	0.00260804	0.00279795	0.00212387
hycI		0.000306578	0.000489906	0.000339389	0.000315347	0.000307382
rsxC		0.00136472	0.00107677	0.00075985	0.00054573	0.000261986
nuoM	Co-Factor	0.000934343	0.00119223	0.00250557	0.00237153	0.00177695
xdhB		0.000473827	0.000135848	0.000328525	0.000808254	0.0036079
feaB		0.000673632	0.00206632	0.00288075	0.00379145	0.00390158
gltP		0.000514719	4.50205e-05	0.000212843	0.000114277	0.000111456
ydeP		0.000894702	0.000236856	0.00108971	0.0025724	8.67772e-05
hybC		0.00056298	0.000525621	0.000702646	0.00512072	0.00421071
astD		0.000472202	0.000414782	0.000739168	0.00100778	0.00144398
fdoH		0.000228285	0.000196564	0.000137241	0.000214788	0.000191855
nirB		0.000469413	0.000518098	0.000481284	0.000353873	0.000299789
xdhC		5.55958e-05	0.000362055	1.11466e-05	5.68735e-06	8.2268e-05
nuoL	Co-Factor	0.000205348	0.000268837	0.00102912	0.000483997	0.000554604
fdhD		7.42006e-05	3.15517e-05	4.97544e-05	4.86224e-05	6.89423e-05
dmsA		0.000209141	0.000350124	0.000345091	0.000111072	7.75243e-05
hyaB		0.000125127	0.000132806	0.00013575	0.000129089	0.000146021
hycE		0.00011756	0.000191165	7.09836e-05	0.000136029	0.000206802
narJ		4.74547e-05	0.00033897	9.16533e-05	0.00011638	0.000151313
glcA		9.8896e-05	0.000717884	0.00146654	0.00714225	0.0113429
appC	Co-Factor	9.65636e-05	3.24169e-05	3.90125e-05	3.57484e-05	4.5178e-05
napA		0.00010756	0.000386907	7.17966e-05	0.000400226	0.000718837
glcF		1.99386e-05	0.000261915	0.000119749	0.000641628	0.000623474
fdoI		6.78186e-06	6.0878e-07	1.17523e-05	5.49869e-07	4.75029e-07
narG		3.76528e-05	0.0003391	0.000118047	0.000180643	0.000288729
ygiQ		1.38886e-05	4.65128e-05	3.2828e-06	6.9228e-05	1.00301e-05
narI		9.29177e-07	8.43924e-07	8.53154e-07	7.61354e-07	6.63038e-07
ykgE		5.14512e-07	2.04388e-05	4.87912e-07	2.52512e-05	3.66636e-07
hyaA		6.36994e-07	4.18886e-05	5.95647e-07	2.54464e-05	3.76596e-05
glcE		5.43641e-07	5.03189e-07	5.17362e-07	4.56415e-07	3.91266e-07
paaE		5.40074e-07	4.95404e-07	4.98192e-07	4.3855e-07	3.79658e-07
glpC		4.73402e-07	0.000278598	4.48252e-07	2.35278e-06	3.41018e-07
narH		5.3601e-07	4.88699e-07	5.00592e-07	4.41564e-07	1.2858e-05
ynfF		6.1341e-07	5.56449e-07	5.82761e-07	5.04357e-07	7.62003e-06
Subdivision	Glucose (absolute)	Glucose (fraction)			Glycerol (absolute)	Glycerol (fraction)			Glucose chemostat (absolute)
Respiration (TCA)	10.1488	0.452294		Respiration (TCA)	12.2995	0.376976		Respiration (TCA)	16.8266	15.4978	13.0512
Fermentation (acetate)	0.219862	0.00979843		Fermentation (acetate)	0.185751	0.00569324		Fermentation (acetate)	0.144047	0.144953	0.145654
Co-factor regeneration	7.89415	0.351812		Co-factor regeneration	9.73875	0.29849		Co-factor regeneration	10.5665	9.84312	9.12315
Shared resp/ferm	4.1757	0.186095		Shared resp/ferm	10.4027	0.31884		Shared resp/ferm	10.3822	16.0817	17.1322
Total considered	22.4385	1		Total considered	32.6267			Total considered	37.9194	41.5676	39.4522
Total	24.8938			Total	35.9001			Total	41.8704	46.2573	44.3302
Percentage total	0.901369			Percentage total	0.908819			Percentage total	0.905639	0.898616	0.889963
									Glucose chemostat (fraction)
								Respiration (TCA)	0.443747	0.372833	0.330811
								Fermentation (acetate)	0.00379877	0.00348717	0.00369191
								Co-factor regeneration	0.278658	0.236798	0.231246
								Shared resp/ferm	0.273797	0.386882	0.434252
								growth rate	0.5	0.35	0.2
					0.2

## Sheet: NCM3722
	Protein Mass (fg) / Cell
Gene	medianNormInt_NCM3722.Glu	Functional group
aceB	1.77891e+06	Co-Factor
adhE	2.95665e+07	Co-Factor
aldA	2.58686e+07	Co-Factor
atpB	973320	Co-Factor
atpC	1.25139e+07	Co-Factor
atpD	1.36735e+08	Co-Factor
atpF	1.54167e+07	Co-Factor
atpG	8.4927e+06	Co-Factor
atpH	1.37726e+07	Co-Factor
cydA	1.22408e+06	Co-Factor
cydB	59097.5	Co-Factor
cydC	499961	Co-Factor
cydD	416167	Co-Factor
cyoA	3.50581e+06	Co-Factor
cyoC	6619.98	Co-Factor
cyoD	39194.1	Co-Factor
fldA	12337732	Co-Factor
frdB	102617	Co-Factor
ghrB	4.11678e+06	Co-Factor
leuB	1.47842e+07	Co-Factor
mioC	3.31752e+06	Co-Factor
ndh	4.24763e+06	Co-Factor
nuoA	653251	Co-Factor
nuoB	991466	Co-Factor
nuoE	1.89547e+06	Co-Factor
nuoF	3.85542e+06	Co-Factor
nuoH	374765	Co-Factor
nuoI	1.71124e+06	Co-Factor
nuoL	21902.4	Co-Factor
nuoN	86403.6	Co-Factor
pflB	4.35527e+07	Co-Factor
pntB	1.3433e+07	Co-Factor
qorA	964400	Co-Factor
ybdH	1.15105e+06	Co-Factor
ybiC	2.07409e+06	Co-Factor
ydjA	3.11917e+06	Co-Factor
yggX	8.40542e+06	Co-Factor
ackA	2.10312e+07	Fermentation
aceA	6.64217e+06	Shared
aceE	7.24126e+07	Shared
aceF	7.1706e+07	Shared
acnA	1.26797e+06	TCA
acnB	1.00557e+08	TCA
fumA	1.56205e+07	TCA
fumC	1.63268e+06	TCA
gltA	7.67286e+07	TCA
icd	1.85795e+08	TCA
maeA	3.0425e+06	TCA
maeB	4.02788e+06	TCA
mdh	1.63334e+08	TCA
ppc	3.10227e+07	TCA
sdhA	2.19639e+07	TCA
sdhB	1.29076e+07	TCA
sdhC	1.84932e+06	TCA
sdhD	239971	TCA
sucA	3.54501e+07	TCA
sucB	3.66245e+07	TCA
sucC	6.07668e+07	TCA
alaS	3.80348e+07
apt	5.82525e+06
atpE	651451
avtA	1.06176e+06
bfr	626030
cyoB	2.79585e+06
dctA	44267.5
dld	2.12001e+06
fadH	66201.1
fbp	6.05643e+06
fdoG	1.4162e+06
fdoH	55206.4
fdoI	232.408
fldB	480281
fpr	223805
frdA	293164
frmA	2.34512e+06
fucO	42077.5
gabD	502776
galT	266157
glcB	1.29123e+06
glcD	1466.98
glcE	18.2443
glcF	2097.55
gldA	38395.1
glpA	227753
glpC	43292
glpD	1.93341e+06
glpK	4.24763e+06
glpQ	1.20897e+06
gltP	30186.7
gor	1.46347e+06
gpsA	1.41889e+06
hemG	188741
hmp	655497
hybC	28621
hybD	19076.9
ldhA	1.56977e+06
lldD	515430
narG	2528.73
narH	11073.9
narJ	1896.2
nemA	657620
nfsA	714811
nirB	56744.6
nuoC	9.36145e+06
nuoG	1.13711e+07
paaE	417.497
pntA	1.78608e+07
ppa	1.97389e+07
prkB	255417
prr	23626.5
putA	1.07967e+06
puuC	105843
sthA	2.0645e+06
sucD	4.05665e+07
tas	237433
tdcE	3781.21
ugpQ	43150.6
yajO	339311
ydbC	131382
ydbK	788682
ydiJ	5.26856e+06
yhbW	300615
ykgE	13200.5
yqcA	149280
yqhD	3.72278e+06
Subdivision				Energy fraction
Respiration (TCA)		7.52831e+08		0.58058
Fermentation (acetate)		2.10312e+07		0.0162192
Co-factor regeneration		3.72065e+08		0.286935
Shared resp/ferm		1.50761e+08		0.116266
Total considered		1.29669e+09
Total		1.48935e+09
Percentage total		0.87064

## Sheet: MG1655
	Protein Mass (fg) / Cell
Gene	medianNormInt_MG1655.Glu	Functional group
atpD	1.15252e+08	Co-Factor
pflB	3.42258e+07	Co-Factor
adhE	2.84497e+07	Co-Factor
aceB	1.78476e+07	Co-Factor
atpF	1.51065e+07	Co-Factor
aldA	1.37906e+07	Co-Factor
fldA	1.35022e+07	Co-Factor
leuB	1.32028e+07	Co-Factor
atpH	1.25839e+07	Co-Factor
atpC	1.14968e+07	Co-Factor
yggX	8.44374e+06	Co-Factor
atpG	7.62421e+06	Co-Factor
ghrB	6.69012e+06	Co-Factor
pntB	6.5009e+06	Co-Factor
mioC	5.69134e+06	Co-Factor
ydjA	4.54735e+06	Co-Factor
ybiC	3.69769e+06	Co-Factor
ndh	2.94995e+06	Co-Factor
cyoA	2.4572e+06	Co-Factor
nuoF	2.29949e+06	Co-Factor
nuoE	1.6337e+06	Co-Factor
qorA	1.44195e+06	Co-Factor
nuoI	1.30726e+06	Co-Factor
ybdH	904501	Co-Factor
cydA	800535	Co-Factor
nuoB	697569	Co-Factor
atpB	572906	Co-Factor
frdB	345521	Co-Factor
nuoA	328727	Co-Factor
cydC	210112	Co-Factor
cydD	125087	Co-Factor
nuoH	100810	Co-Factor
cyoD	61726.6	Co-Factor
cydB	40773.1	Co-Factor
nuoN	14939.4	Co-Factor
nuoL	1132.37	Co-Factor
cyoC	18.2847	Co-Factor
ackA	1.68438e+07	Fermentation
aceA	7.89643e+07	Shared
aceF	6.81622e+07	Shared
aceE	5.21958e+07	Shared
icd	1.93167e+08	TCA
mdh	1.72568e+08	TCA
acnB	1.03865e+08	TCA
gltA	3.87741e+07	TCA
sucC	3.81828e+07	TCA
ppc	2.43937e+07	TCA
sucB	1.96642e+07	TCA
sucA	1.50949e+07	TCA
sdhA	1.34993e+07	TCA
fumA	1.10496e+07	TCA
sdhB	9.20085e+06	TCA
maeA	3.44192e+06	TCA
maeB	2.57105e+06	TCA
fumC	1.917e+06	TCA
acnA	1.7776e+06	TCA
sdhC	466420	TCA
sdhD	122578	TCA
glpD	4.37006e+07
glpK	3.36311e+07
ppa	2.57236e+07
alaS	2.54871e+07
sucD	2.48555e+07
pntA	1.54107e+07
nuoG	1.11812e+07
nuoC	7.2906e+06
yqhD	5.99343e+06
apt	5.37307e+06
fbp	4.27865e+06
ydiJ	3.25475e+06
glpQ	2.62151e+06
gor	2.15025e+06
sthA	2.10595e+06
cyoB	1.95341e+06
dld	1.90378e+06
frmA	1.81253e+06
avtA	1.61628e+06
glcB	1.57761e+06
fdoG	1.48722e+06
ldhA	1.39026e+06
bfr	1.21259e+06
gpsA	1.19868e+06
nfsA	816555
putA	703091
glpA	661242
gabD	652666
lldD	617433
puuC	611965
nemA	556509
fldB	537978
ydbK	533834
hmp	430944
yhbW	425515
atpE	395630
tas	392086
yajO	362664
frdA	288662
fpr	269939
yqcA	257598
prkB	247085
gldA	226318
ydbC	199427
hemG	164949
galT	115797
ugpQ	90204.7
dctA	88990.2
fadH	76375.3
glpC	67529.1
fdoH	58358.2
fucO	52576.5
nirB	46252.4
hybC	35950.9
narH	26798.1
gltP	18708.6
hybD	18417.1
prr	17393.2
tdcE	12113.7
ykgE	5013.31
narG	4380.76
fdoI	1950.32
glcF	1490.61
glcD	488.355
paaE	18.4406
narJ	18.376
glcE	18.3513
Subdivision			Energy fraction
Respiration (TCA)	6.49756e+08		0.541071
Fermentation (acetate)	1.68438e+07		0.0140263
Co-factor regeneration	3.34947e+08		0.278921
Shared resp/ferm	1.99322e+08		0.165982
Total considered	1.20087e+09
Total	1.43817e+09
Percentage total	0.834998
